# Supplementary material
Source: PubMed Central journal article supplement (PMC1478168)

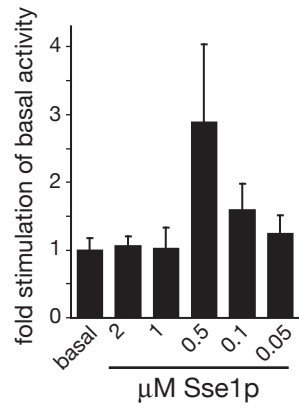

**Figure 1:** Titration of Sse1p concentrations in the *in vitro* luciferase refolding assay

Supplement: 7601139s1.pdf [file 7601139s1.pdf]
